# Supplementary material for: Adsorption of Cobalt and Strontium Ions on Plant-Derived Activated Carbons: The Suggested Mechanisms
Source: MDPI journal article supplement (doi:10.3390/c9030071), 2023-07-21
Supplement: s1 [file s1]

# Adsorption of Cobalt and Strontium ions on Plant-derived Activated Carbons. The Suggested Mechanisms

Irina Ceban (Ginsari) <sup>1</sup>, Tudor Lupascu <sup>1</sup>, Sergey Mikhalovsky <sup>2,3</sup> and Raisa Nastas <sup>1,\*</sup>

<sup>1</sup> Institute of Chemistry, Moldova State University, 3, Academiei Str., 2028 Chisinau, Moldova;

irina.ginsari@ichem.md (I.C.); lupascut@gmail.com (T.L.)

<sup>2</sup> ANAMAD Ltd., Sussex Innovation Centre, Science Park Square, Falmer, Brighton BN1 9SB, UK;

sergeymikhalovsky@gmail.com

<sup>3</sup> Chuiko Institute of Surface Chemistry, National Academy of Sciences of Ukraine 17, General Naumov Str., 03164 Kyiv, Ukraine

\* Correspondence: [raisa.nastas@ichem.md](mailto:raisa.nastas@ichem.md)

**Table S1.** The metal quantity (%) in activated carbons, recalculated to oxides.

| Sample   | MgO   | CaO   | Na <sub>2</sub> O | K <sub>2</sub> O | Fe <sub>2</sub> O <sub>3</sub> | MnO <sub>2</sub> | CuO   | ZnO   |
|----------|-------|-------|-------------------|------------------|--------------------------------|------------------|-------|-------|
| CA-N     | 0.071 | 0.433 | 2.426             | 0.104            | 0.285                          | 0.051            | 0.002 | 0.061 |
| CA-M     | 0.067 | 0.237 | 2.102             | 0.079            | 0.060                          | 0.034            | 0.002 | 0.002 |
| CA-Nox-u | 0.035 | 0.018 | 0.007             | 0.022            | 0.065                          | 0.009            | 0.002 | 0.002 |
| CA-Mox-u | 0.032 | 0.034 | 0.038             | 0.178            | 0.013                          | 0.009            | 0.001 | 0.001 |
| CA-Mox   | 0.022 | 0.024 | 0.044             | 0.052            | 0.028                          | 0.004            | 0.001 | 0.006 |

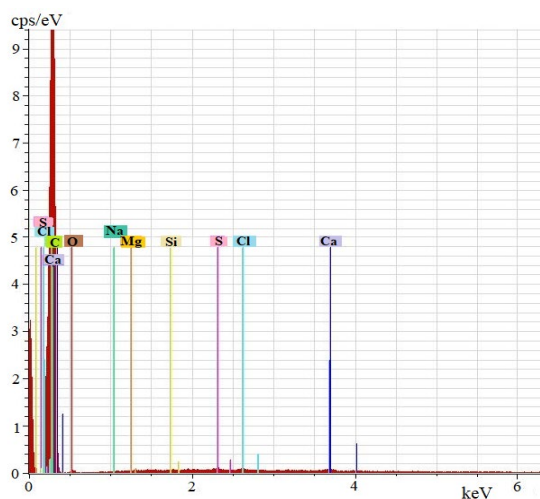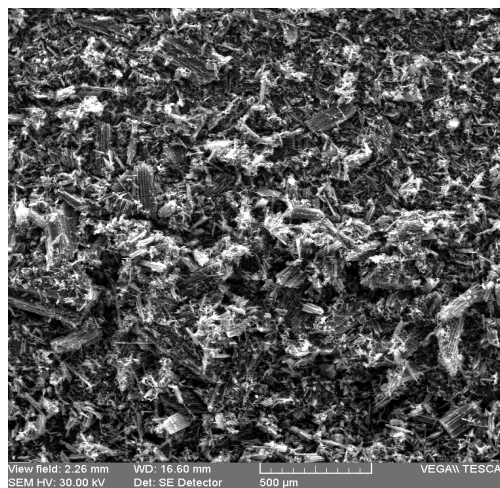

**a**

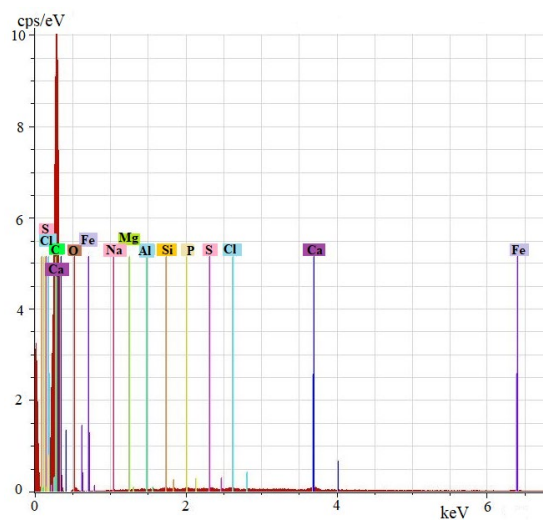

**b**

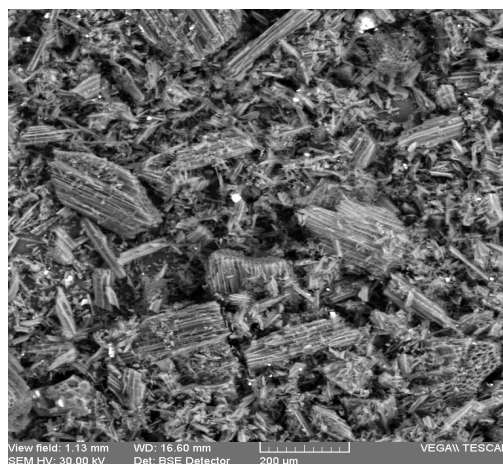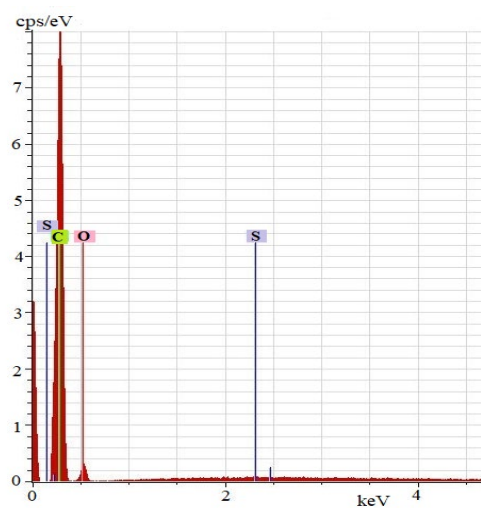

**c**

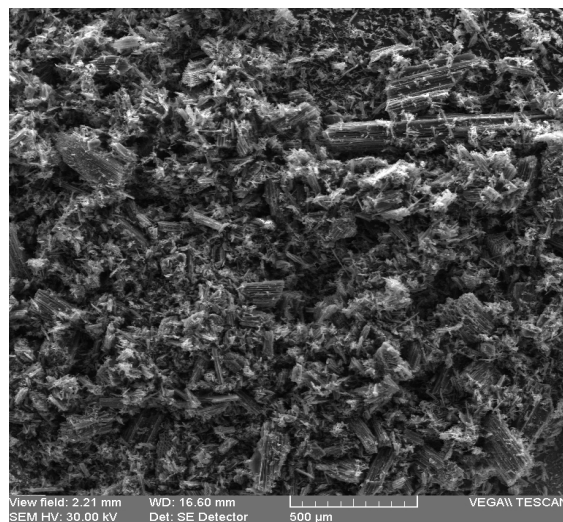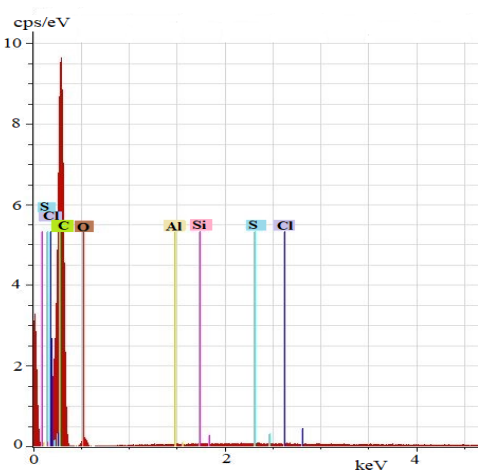

**d**

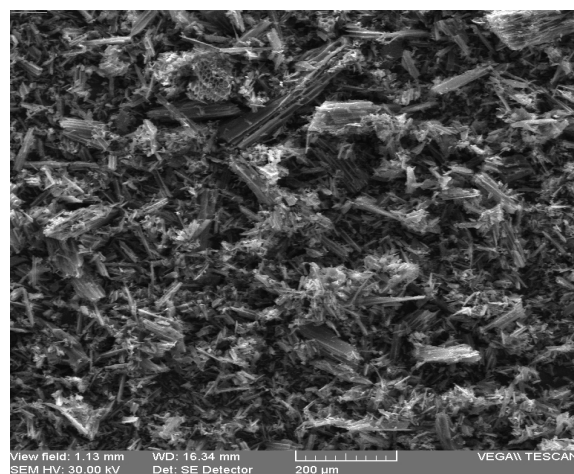

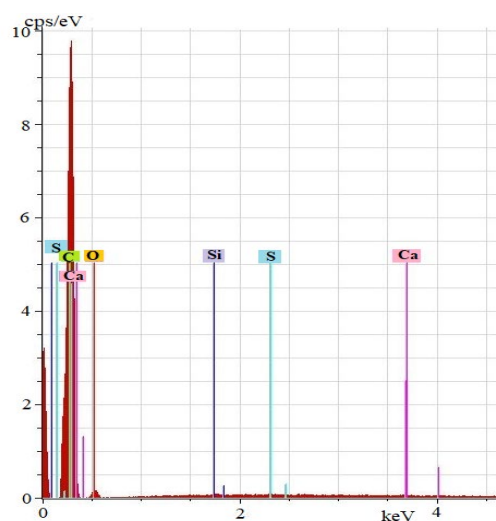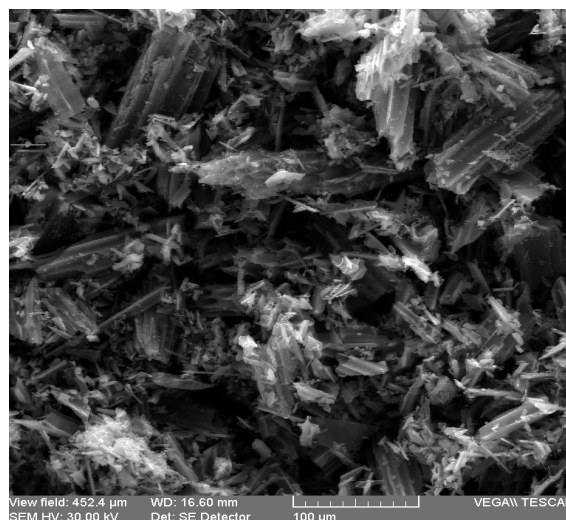

e

**Figure S1.** SEM-EDX profiles for activated carbons: (a) CA-N; (b) CA-M; (c) CA-Nox-u; (d) CA-Mox-u; (e) CA-Mox.

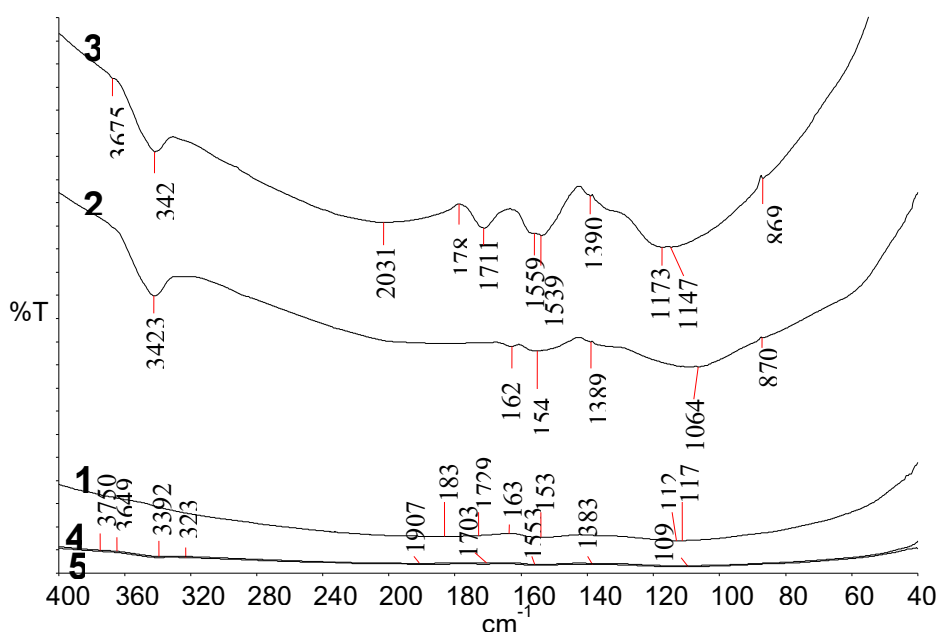

**Figure S2.** FTIR spectra of activated carbons: (1) CA-M; (2) CA-N; (3) CA-Mox; (4) CA-Mox-u; (5) CA-Nox-u.

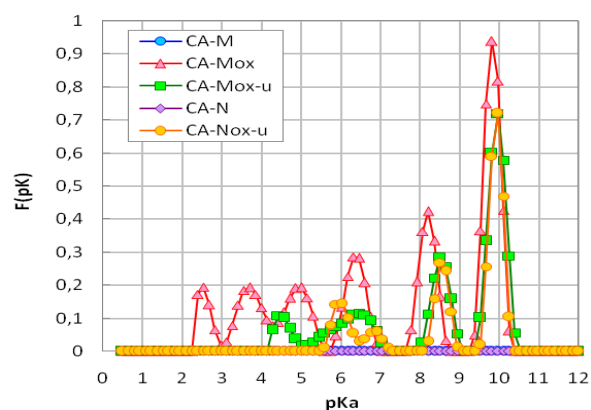

**Figure S3.** Distribution of surface groups according to the dissociation constants pK [1]

1. GINSARI, I., NASTAS, R., LUPASCU, T., PODDUBNAYA, O., PUZIY, A. Determination of surface groups on activated carbons by Boehm and potentiometric titration. In: *International Conference Achievements and Perspectives of Modern Chemistry*, October 9-11, 2019, Chisinau, p. 148. ISBN 978-9975-62-428-2.

**Table S2.** Kinetic parameters and  $q_e$  values of the adsorption process of cobalt ions ( $C_0 = 2$  mmol/L) on oxidized activated carbons.

| Sample   | <i>Pseudo-first-order kinetic model (Lagergren)</i> |                               |                               |       |
|----------|-----------------------------------------------------|-------------------------------|-------------------------------|-------|
|          | $q_e(\text{exp})$<br>(mmol/g)                       | $k_1$<br>(min <sup>-1</sup> ) | $q_e(\text{cal})$<br>(mmol/g) | $R^2$ |
| CA-Mox   | 0.085                                               | 0.00005                       | 0.078                         | 0.575 |
| CA-Mox-u | 0.056                                               | 0.00741                       | 0.021                         | 0.921 |
| CA-Nox-u | 0.041                                               | 0.0160                        | 0.026                         | 0.906 |

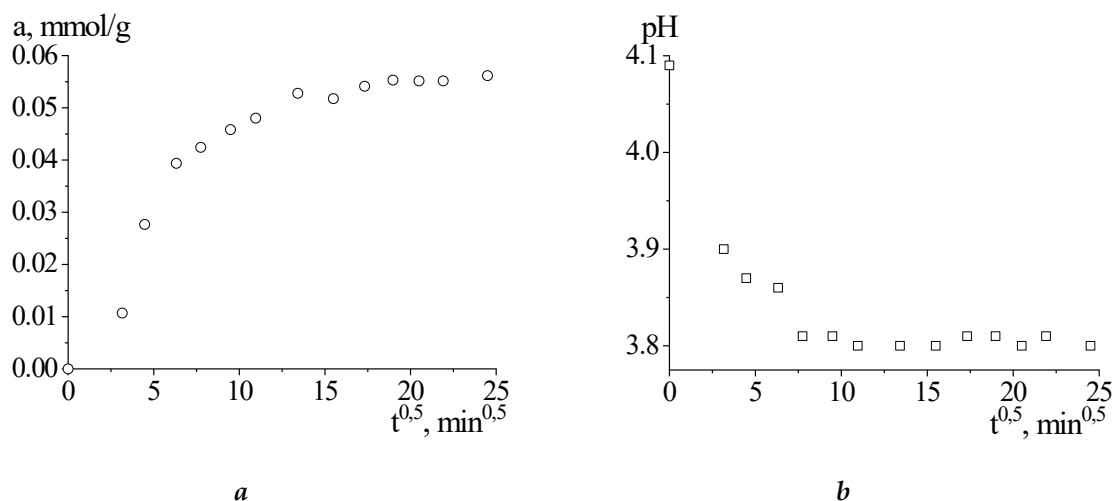

**Figure S4.** Intraparticle diffusion kinetic model (Weber-Morris) for cobalt ions adsorption on oxidized activated carbon CA-Mox-u. (a) The the plot of  $a_i$  versus  $t^{1/2}$ , (b) the plot of  $pH_i$  versus  $t^{1/2}$ .

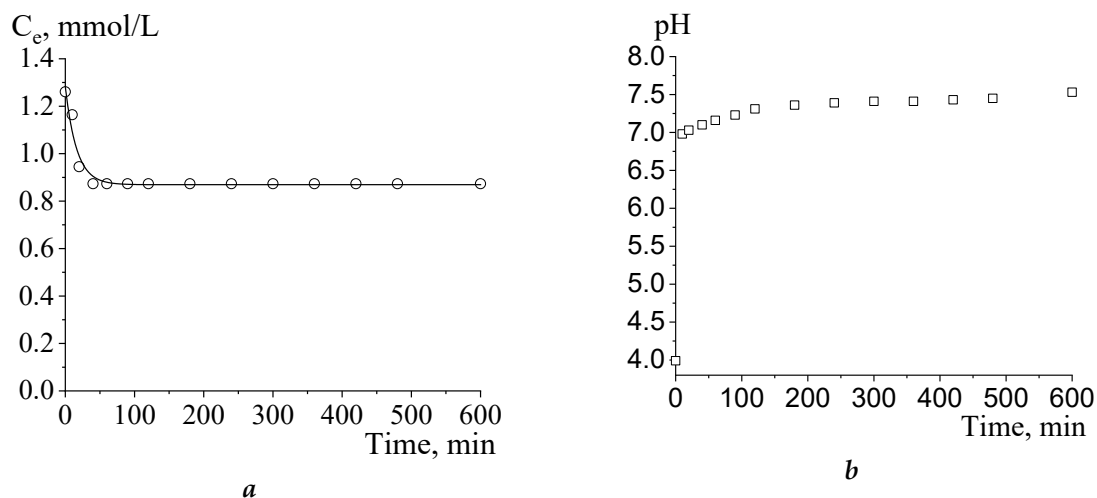

**Figure S5.** Kinetics of strontium ions adsorption on initial activated carbon CA-N. (a) The variation of strontium ions concentration in solution with time; (b) The pH value of solutions after adsorption of strontium ions on activated carbon. Solid:liquid ratio - 1:100, pH=4.

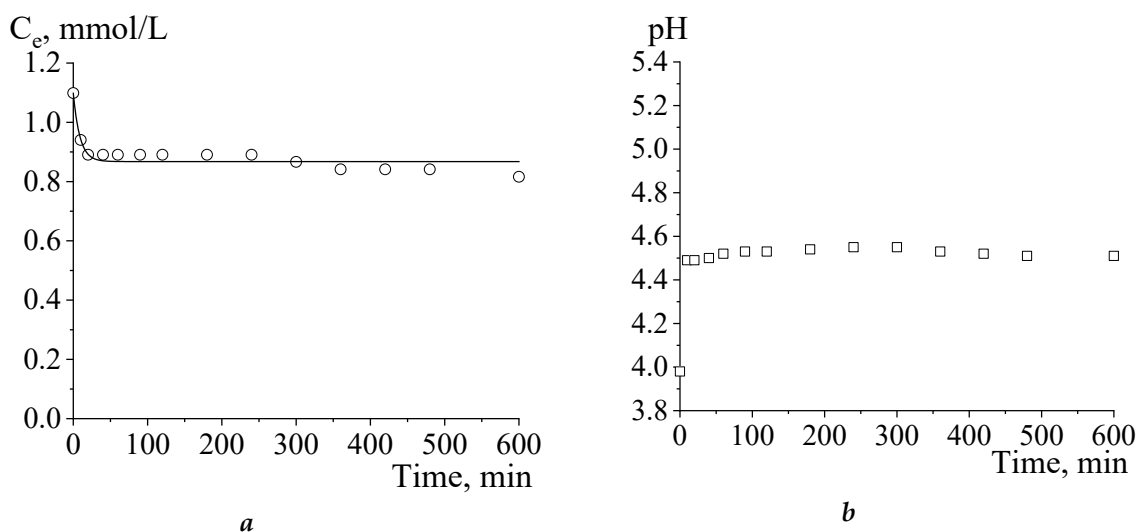

**Figure S6.** Kinetics of strontium ions adsorption on oxidized activated carbon CA-Mox-u. (a) The variation of strontium ions concentration in solution with time; (b) The pH value of solutions after adsorption of strontium ions on activated carbon. Solid:liquid ratio - 1:100, pH=4.

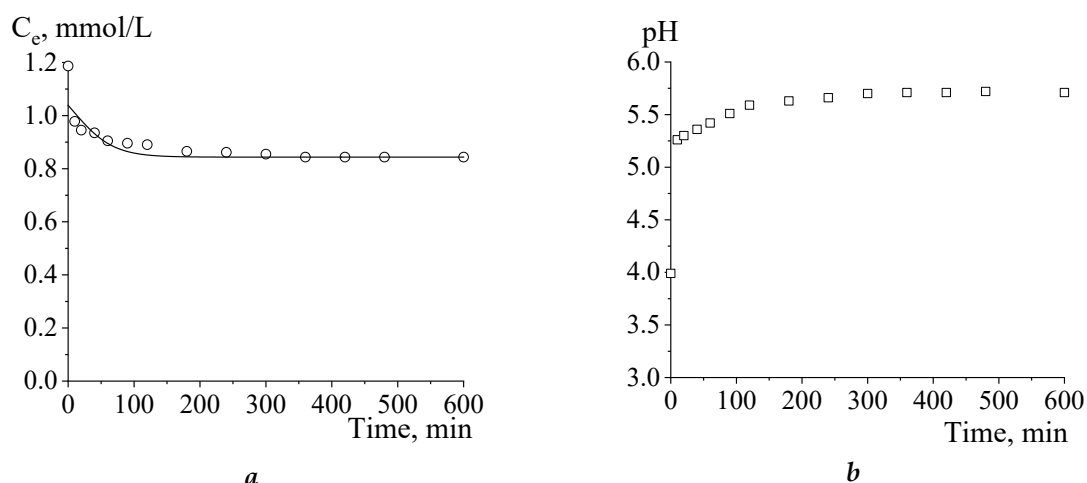

**Figure S7.** Kinetics of strontium ions adsorption on oxidized activated carbon CA-Nox-u. (a) The variation of strontium ions concentration in solution with time; (b) The pH value of solutions after adsorption of strontium ions on activated carbon. Solid:liquid ratio - 1:100, pH=4.

**Table S3.** Kinetic parameters and  $q_e$  values of the adsorption process of strontium ions on activated carbons.

| Mostra   | <i>Pseudo-first-order kinetic model (Lagergren)</i> |                               |                               |       |
|----------|-----------------------------------------------------|-------------------------------|-------------------------------|-------|
|          | $q_e(\text{exp})$<br>(mmol/g)                       | $k_1$<br>(min <sup>-1</sup> ) | $q_e(\text{cal})$<br>(mmol/g) | $R^2$ |
| CA-M     | 0.032                                               | 0.02948                       | 0.023                         | 0.884 |
| CA-N     | 0.034                                               | 0.13984                       | 0.118                         | -     |
| CA-Mox   | 0.077                                               | 0.00636                       | 0.011                         | 0.524 |
| CA-Mox-u | 0.041                                               | 0.01497                       | 0.024                         | 0.915 |
| CA-Nox-u | 0.034                                               | 0.00636                       | 0.011                         | 0.524 |

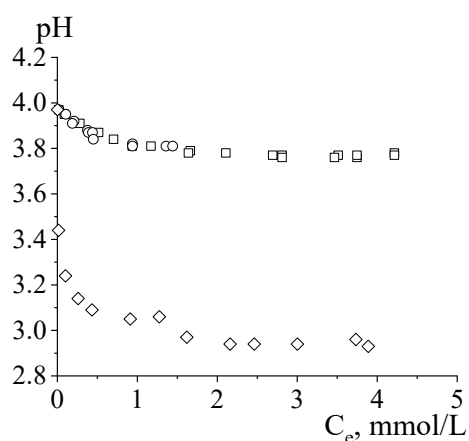

**Figure S8.** The pH value of solution at equilibrium for adsorption isotherms of cobalt ions on oxidized activated carbons: ( $\diamond$ ) CA-Mox and ( $\square$ ) CA-Nox-u. Solid:liquid ratio - 1:100, pH 4.

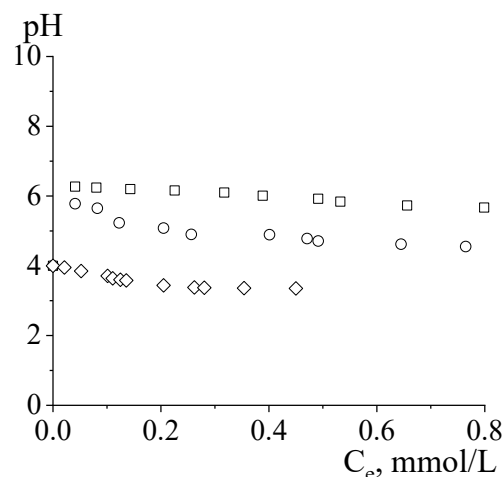

**Figure S9.** The pH value of solution at equilibrium for adsorption isotherms of strontium ions on oxidized activated carbons: (◊) CA-Mox, (○) CAMox-u and (◻) CA-Nox-u. Solid:liquid ratio - 1:100, pH 4.

**Table S4.** Ions properties (selectiv) [1].

|                                | $Sr^{2+}$ | $Co^{2+}$ |
|--------------------------------|-----------|-----------|
| Electronegativity (Pauling)    | 0.95      | 1.88      |
| Radius of ion (nm)             | 0.125     | 0.084     |
| Radius of hydrated ion (nm)    | 0.412     | 0.423     |
| Hydration-free energy (kJ/mol) | -1380     | -1996     |

1. Persson, I. Hydrated metal ions in aqueous solution: How regular are their structures?. *Pure and Applied Chemistry* **2010**, Volume 82, no. 10, pp. 1901-1917. doi:10.1351/PAC-CON-09-10-22.

**Table S5.** Comparison of the adsorption capacity of the studied activated carbons with other carbonaceous adsorbents used for the removal of Co(II) and Sr(II) ions.

| Metal ion | Carbonaceous adsorbent, characterization                                                   | Adsorption capacity, mmol/g | Reference |
|-----------|--------------------------------------------------------------------------------------------|-----------------------------|-----------|
| $Co^{2+}$ | COSAC, olive stones activated carbon prepared by chemical activation using phosphoric acid | 0.174                       | [1]       |
|           | COSAC(HNO <sub>3</sub> ), olive stones activated carbon oxidized with nitric acid          | 0.329                       | [1]       |
|           | COSAC(O <sub>3</sub> ), olive stones activated carbon oxidized with ozone                  | 0.275                       | [1]       |
|           | HSAC, activated carbon prepared from hazelnut shells                                       | 0.235                       | [2]       |
|           | XSA(H <sub>3</sub> PO <sub>4</sub> ), Xanthoceras Sorbifolia Bunge hull activated carbon   | 2.136                       | [3]       |
|           | TPC, activated carbon prepared from Thespesia Populnea bark                                | 0.16                        | [4]       |



|                  |                                                                                                   |        |           |
|------------------|---------------------------------------------------------------------------------------------------|--------|-----------|
|                  | CG, carbon gel                                                                                    | 0.098  | [5]       |
|                  | CG-0.5GIC, carbon gel doped with 0.5 wt% of GIC (graphite intercalation compound)                 | 0.137  | [5]       |
|                  | CA-Mox, activated carbon from apple wood, oxidized with nitric acid                               | 0.085  | This work |
|                  | CA-Mox-u, activated carbon from apple wood, oxidized with nitric acid/urea mixture                | 0.056  | This work |
|                  | CA-Nox-u, activated carbon from walnut shells, oxidized with nitric acid/urea mixture             | 0.041  | This work |
| Sr <sup>2+</sup> | Granular activated carbon, supplied by Merck, Germany                                             | 0.507  | [6]       |
|                  | Activated carbon, Sinopharm Chemical Reagent Co., Ltd., Shanghai, China                           | 0.012  | [7]       |
|                  | AC-Fe, activated carbon doped with iron oxide (Fe <sub>2</sub> O <sub>3</sub> ) nanoparticles.    | 0.109  | [8]       |
|                  | CAN-7, activated carbon from nut shells by chemical activation with phosphoric acid               | ~ 0.19 | [9]       |
|                  | CAN-8, activated carbon from nut shells, physico-chemical method of activation with water vapours | ~ 0.22 | [10]      |
|                  | RS1, activated carbon from rice straw                                                             | 0.145  | [11]      |
|                  | PS276a, carbon material from pecan shells by impregnation with phosphoric acid solution           | 2.055  | [12]      |
|                  | CA-Mox, activated carbon from apple wood, oxidized with nitric acid                               | 0.076  | This work |
|                  | CA-Mox-u, activated carbon from apple wood, oxidized with nitric acid/urea mixture                | 0.040  | This work |
|                  | CA-Nox-u, activated carbon from walnut shells, oxidized with nitric acid/urea mixture             | 0.034  | This work |

1. Thouraya, B.; Abdelmottaleb, O. Improvement of oxygen-containing functional groups on olive stones activated carbon by ozone and nitric acid for heavy metals removal from aqueous phase. *Environmental Science and Pollution Research* **2015**, Volume 23, no. 16, pp. 15852-15861. [10.1007/s11356-015-4330-0](https://doi.org/10.1007/s11356-015-4330-0).
2. Demirbas, E. Adsorption of Cobalt(II) Ions from Aqueous Solution onto Activated Carbon Prepared from Hazelnut Shells. *Adsorption Science & Technology* **2003**, Volume 21, no. 10, pp. 951-963.
3. Zhang, X.; Hao, Y.; Wang, X.; Chen, Z. Adsorption of iron(III), cobalt(II), and nickel(II) on activated carbon derived from Xanthoceras Sorbifolia Bunge hull: mechanisms, kinetics and influencing parameters. *Water Science and Technology* **2017**, Volume 75, no. 8, pp. 1849–1861.
4. Prabakaran, R.; Arivoli, S. Removal of Cobalt (II) from Aqueous Solutions by Adsorption on Low cost activated carbon. *International Journal of Science, Engineering and Technology Research (IJSETR)* **2013**, Volume 2, no. 2, pp. 271-283.
5. Osinska, M. Removal of lead(II), copper(II), cobalt(II) and nickel(II) ions from aqueous solutions using carbon gels. *Journal Sol-Gel Science and Technology* **2017**, Volume 81, no. 3, pp. 678–692.
6. Chegrouche, S.; Mellah, A.; Barkat M. Removal of strontium from aqueous solutions by adsorption onto activated carbon: kinetic and thermodynamic studies. *Desalination* **2009**, Volume 235, pp. 306-318, [10.1016/j.desal.2008.01.018](https://doi.org/10.1016/j.desal.2008.01.018).
7. Hu Li, Kexue Han, Jinhua Shang, Weihai Cai, Minghao Pan, Donghui Xu, Can Du and Rui Zuo. Comparison of Adsorption Capacity and Removal Efficiency of Strontium by Six Typical



Adsorption Materials. *Sustainability* **2022**, Volume 14, no. 13, pp. 7723. <https://doi.org/10.3390/su14137723>

8. Almasri, D.A.; Kayvani, F.A.; McKay, G.; Kochkodan, V.; Atieh, M.A. A novel adsorptive ceramic membrane for efficient strontium removal. *Journal of Water Process Engineering*. **2020**, Volume 37, pp. 101538. doi:10.1016/j.jwpe.2020.101538
9. Duca, Gh.; Ciobanu, M.; Lupascu, T.; Povar, I. Adsorption of strontium ions from aqueous solutions on nut shells activated carbons. *Chemistry Journal of Moldova* **2018**, Volume 13, no. 2, pp. 69-73. [dx.doi.org/10.19261/cjm.2018.494](https://doi.org/10.19261/cjm.2018.494).
10. Ciobanu, M.; Botan, V.; Lupascu, T.; Mitina, T.; Rusu, M. Adsorption of strontium ions from water on modified activated carbons. *Chemistry Journal of Moldova. General, Industrial and Ecological Chemistry* **2016**, Volume 11, no. 2, pp. 26-33.
11. Yakout, S.M.; Elsherif, E. Batch kinetics, isotherm and thermodynamic studies of adsorption of strontium from aqueous solutions onto low cost rice-straw based carbons. *Carbon – Science and Technology Carbon – Science and Technology* **2010**, Volume 1, pp. 144–153.
12. Shawabkeh, R.A.; Rockstraw, D.A.; Bhada, R.K. Copper and strontium adsorption by a novel carbon material manufactured from pecan shells. *Carbon* **2002**, Volume 40, no. 5, pp. 781–786.

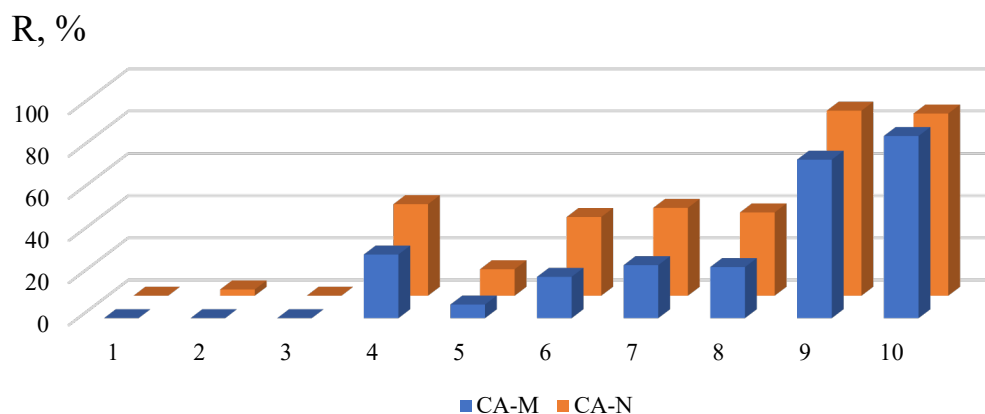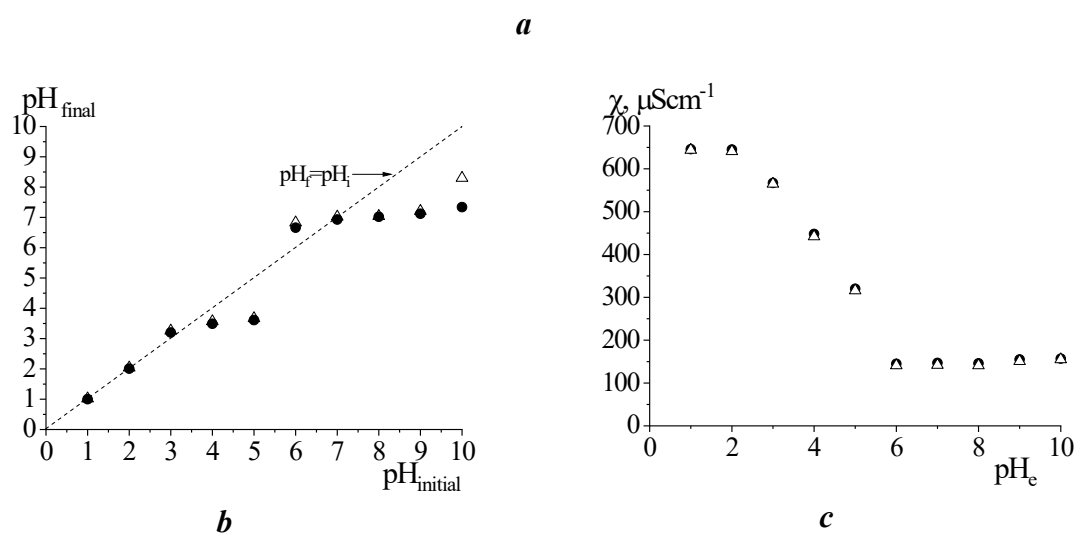

**Figure S10.** The pH influence on the adsorption (removal) of cobalt(II) ions from the solution in the presence of initial activated carbons.

- a) Removal rate (%);
- b) pH of equilibrium solutions for  $\bullet$  CA-M and  $\Delta$  CA-N;
- c) conductivity of equilibrium solutions for  $\bullet$  CA-M and  $\Delta$  CA-N.

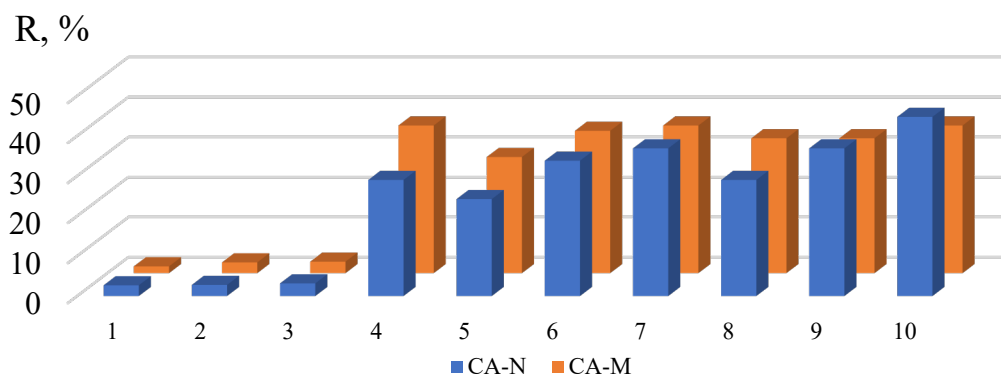

*a*

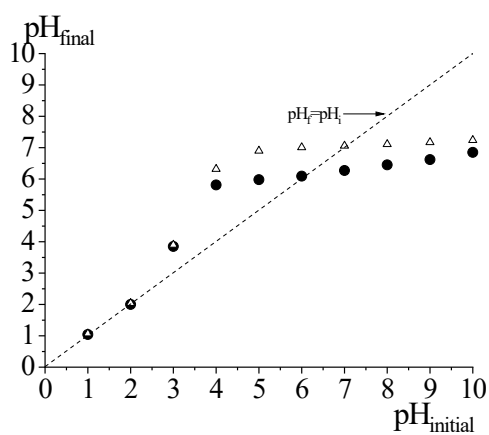

*b*

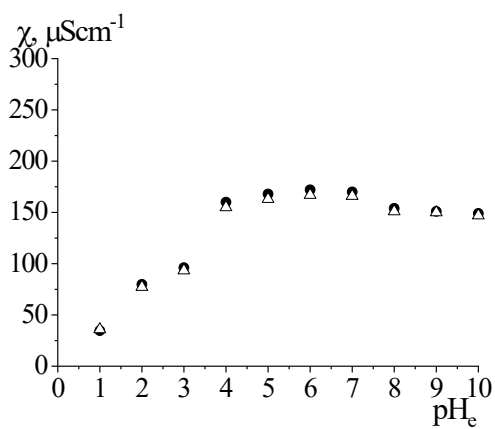

*c*

**Figure S11.** The pH influence on the adsorption (removal) of strontium(II) ions from the solution in the presence of initial activated carbons.

- a) Removal rate (%);
- b) pH of equilibrium solutions for ● CA-M and Δ CA-N;
- c) conductivity of equilibrium solutions for ● CA-M and Δ CA-N.

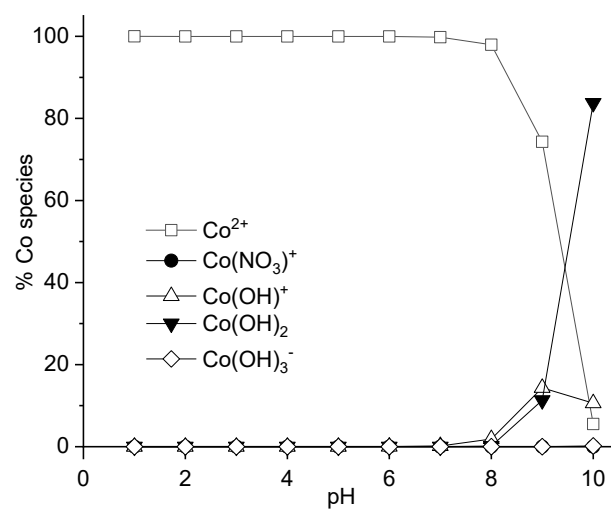

**Figure S12.** Equilibrium mass distribution of Co species as a function of pH.  
 $C_0(\text{Co}(\text{NO}_3)_2)=0.05$  mmol/L, temperature 25°C.

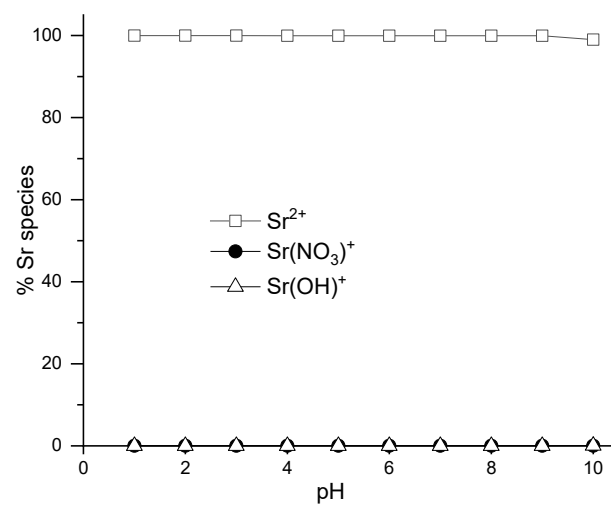

**Figure S13.** Equilibrium mass distribution of Sr species as a function of pH.  
 $C_0(\text{Sr}(\text{NO}_3)_2)=0.05$  mmol/L, temperature 25°C.

## Appendix S1

*The scheme of the activated carbon oxidation installation*

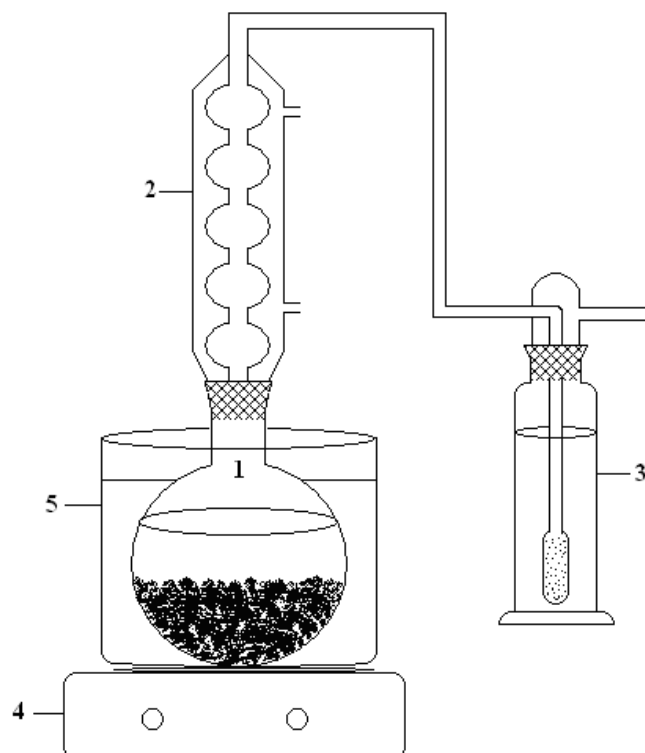

Figure A1. Scheme of the activated carbon oxidation installation.

1- Glass flask; 2- refrigerator; 3- gas capture vessel; 4- electrical heater; 5- water bath.

## Appendix S2

*The explanation of the urea role in the oxidation process of activated carbons with the mixture nitric acid/urea [1]*

In the oxidation process with nitric acid, such conditions as nitric acid concentration, temperature and time are of particular importance, as they influence the oxidation process and the ratio of groups on the surface of the activated carbon. Schematically, the oxidation process of activated carbon with nitric acid can be represented by equation 1.

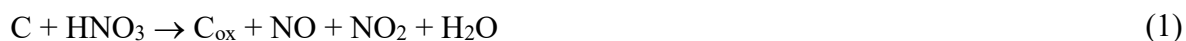

Through the classical method of oxidation with nitric acid (in the absence of urea), activated carbon by absorbing nitrogen oxides released during oxidation forms humic and fulvic acids, which are unstable and soluble in alkaline solutions and can be removed from the surface of activated carbon by washing. This reduces the adsorption capacity of activated carbon by 2-3 times.

In the process of oxidation with nitric acid in the presence of urea, the formation of nitrogen oxides and humic acids does not occur. Nitric acid in combination with urea forms a soluble complex  $\text{H}_2\text{NCONH}_2 \cdot \text{HNO}_3$ , in which the oxidation capacity of nitric acid is lower than that of the free acid in an aqueous solution. When nitrogen oxides are formed (according to reaction 1) they interact with urea through the reactions (2 – 4).

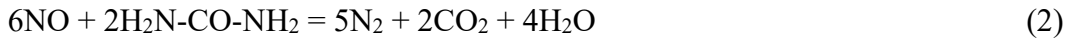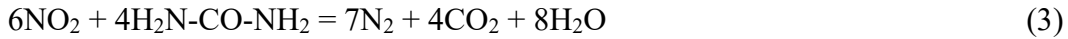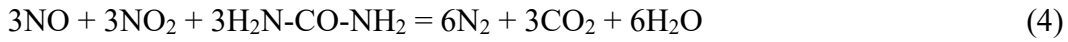

The role of urea is simple because, in combination with nitric acid, it reacts with nitrogen oxides formed in parallel reactions. The reaction products are carbon dioxide, water and nitrogen which do not influence the properties of activated carbons (equation 4).

When nitrogen oxides interact with urea, the complex is destroyed, and nitric acid is released (equation 5). Thus, urea acts as a buffer that in the initial process binds the excess of nitric acid and then releases it as a result of reactions with nitrogen oxides. It has been shown that a small amount of urea significantly reduces the content of nitrogen oxides in the exhaust gases and excess urea leads to complete neutralization of nitrogen oxides. In this method, the step of washing oxidized activated carbons with alkaline solutions to remove humic and fulvic acids is not necessary.

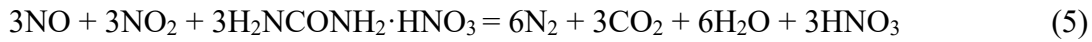

1. Patent RU2105715 C1, Method for production of carbon cation exchanger. Trikhleb VA (UA), Trikhleb LM (UA), published 27.02.1998. (in Russian)

### Appendix S3

#### *Boehm selective neutralization technique [1]*

According to this method, activated carbon sample (0.5g) was equilibrated with 50 mL of each of three bases 0.05N NaHCO<sub>3</sub>, Na<sub>2</sub>CO<sub>3</sub>, NaOH, sealed and shaken for 72 h, and then 10 mL of each filtrate was back-titrated with 0.05N HCl. The surface concentrations of each acidic groups: strong-carboxyl, weak-carboxyl and phenolic; have been determined by differences between the amounts reduced by each of the bases. The schematic neutralization reactions are presented in Figures A1-A3. The total basic surface oxides have been determined with a similar titration technique using 0.05 N HCl and back-titrating with 0.05 N NaOH [2] (Figure A4).

The concentrations of surface acidic groups ( $N^A$ , meq/g) have been calculated by Eq.(1):

$$N^A = \frac{(C_0 - C_e)V}{m} \quad (1)$$

where,  $C_0$  and  $C_e$  are initial and equilibrium concentrations of bases NaHCO<sub>3</sub>, Na<sub>2</sub>CO<sub>3</sub>, NaOH;  $V$  – volume of bases added to active carbon sample, in mL;  $m$  – mass of active carbon sample, in g.

The quantity of the basic functional groups ( $N^B$ , meq/g) has been calculated by Eq.(2):

$$N^B = \frac{(C_0 - C_e)V}{m} \quad (2)$$

where,  $C_0$  and  $C_e$  are initial and equilibrium concentrations of HCl;  $V$  – volume of HCl added to active carbon sample, in mL;  $m$  – mass of active carbon sample, in g.

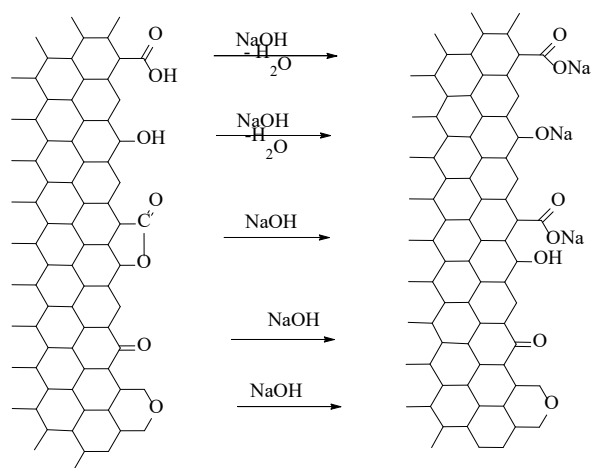

**Figure A1.** Schematic representation of acidic groups neutralisation with 0.05N NaOH solution (Redrawn from [3]).

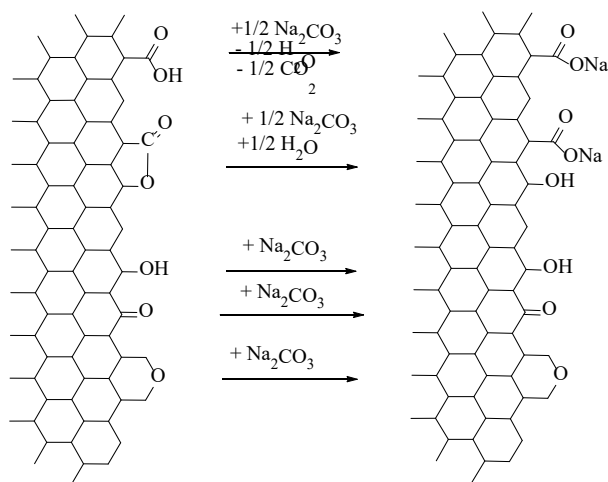

**Figure A2.** Schematic representation of acidic groups neutralisation with 0.05N  $\text{Na}_2\text{CO}_3$  solution (Redrawn from [3]).

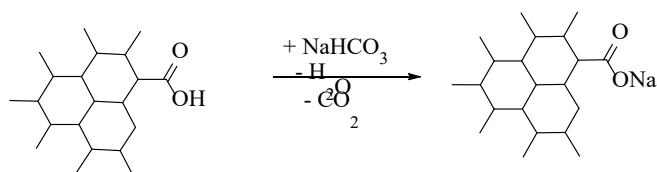

**Figure A3.** Schematic representation of acidic groups neutralisation with 0.05N  $\text{NaHCO}_3$  solution (Redrawn from [3]).

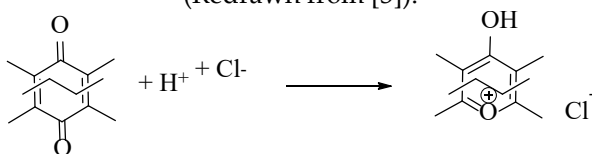

**Figure A4.** Schematic representation of basic groups neutralisation with 0.05N HCl solution (Redrawn from [3]).

1. Boehm, H.P. Chemical identification of surface groups. In *Advances in Catalysis*. Academic Press: New York, 1966, 16, pp. 179-274.



2. Nastas, R.; Rusu, V.; Lupascu, T. Establishing the acid-base properties of activated carbons. *Studia Universitatis Moldaviae* **2016**, Volume 96, no. 6, pp. 170-177. (in Romanian)
3. Boehm, H.P.; Diehl, E.; Heck, W.; Sappok, R. Surface oxides of carbon. *Angewandte Chemie International Edition* **1964**, Volume 3, no. 10, pp. 669-677.

## Appendix S4

### Acid-base properties [1]

Acid-base properties of activated carbons were investigated by potentiometric titration [2] performed in a thermostatic vessel at 25 °C using a 672 Titroprocessor combined with 655 Dosimat (Metrohm, Herisau, Switzerland). To prevent contamination with CO<sub>2</sub>, the flow of pure argon was used throughout the titration. The proton concentration was monitored using an LL pH glass electrode (Metrohm, Herisau, Switzerland). Before experiments, the electrode electromotive force was calibrated to proton concentration by blank titration. Solution equilibria and a correction for possible carbonate and silicate contaminations were calculated using EST software [3]. Proton affinity distributions, F(pK<sub>a</sub>), were calculated from proton-binding isotherms by solving the adsorption integral equation using the CONTIN method [4-7].

1. Puziy, A.M.; Poddubnaya, O.I.; Gawdzik, B.; Sobiesiak, M.; Sprynskyy, M. Structural Evolution of Polyimide-Derived Carbon during Phosphoric Acid Activation. *C* **2022**, 8, 47. <https://doi.org/10.3390/c8030047>
2. Lützenkirchen, J.; Preočanin, T.; Kovačević, D.; Tomišić, V.; Lövgren, L.; Kallay, N. Potentiometric titrations as a Tool for Surface Charge Determination. *Croat. Chem. Acta* **2012**, 85, 391-417.
3. del Piero, S.; Melchior, A.; Polese, P.; Portanova, R.; Tolazzi, M. A Novel Multipurpose Excel Tool for Equilibrium Speciation Based on Newton-Raphson Method and on a Hybrid Genetic Algorithm. *Ann. Chim.* **2006**, 96, 29-49.
4. Provencher, S.W. A Constrained Regularization Method for Inverting Data Represented by Linear Algebraic or Integral Equations. *Comput. Phys. Commun.* **1982**, 27, 213-227.
5. Provencher, S.W. CONTIN: A General Purpose Constrained Regularization Program for Inverting Noisy Linear Algebraic and Integral Equations. *Comput. Phys. Commun.* **1982**, 27, 229-242.
6. Puziy, A.M.; Matynia, T.; Gawdzik, B.; Poddubnaya, O.I. Use of CONTIN for Calculation of Adsorption Energy Distribution. *Langmuir* **1999**, 15, 6016-6025.
7. Puziy, A.M.; Poddubnaya, O.I.; Ritter, J.A.; Ebner, A.D.; Holland, C.E. Elucidation of the Ion Binding Mechanism in Heterogeneous Carbon-Composite Adsorbents. *Carbon* **2001**, 39, 2313-2324.

The pH of point zero charge (PZC) is the value of pH at which the components of surface charge are equal to zero for specified conditions of temperature, pressure, and aqueous solution components. When the pH is lower than the pH<sub>pzc</sub> value, the surface of the adsorbent is positively charged (attracts anions). Conversely, above pH<sub>pzc</sub> the surface is negatively charged (attracting cations/repelling anions) [1,2].

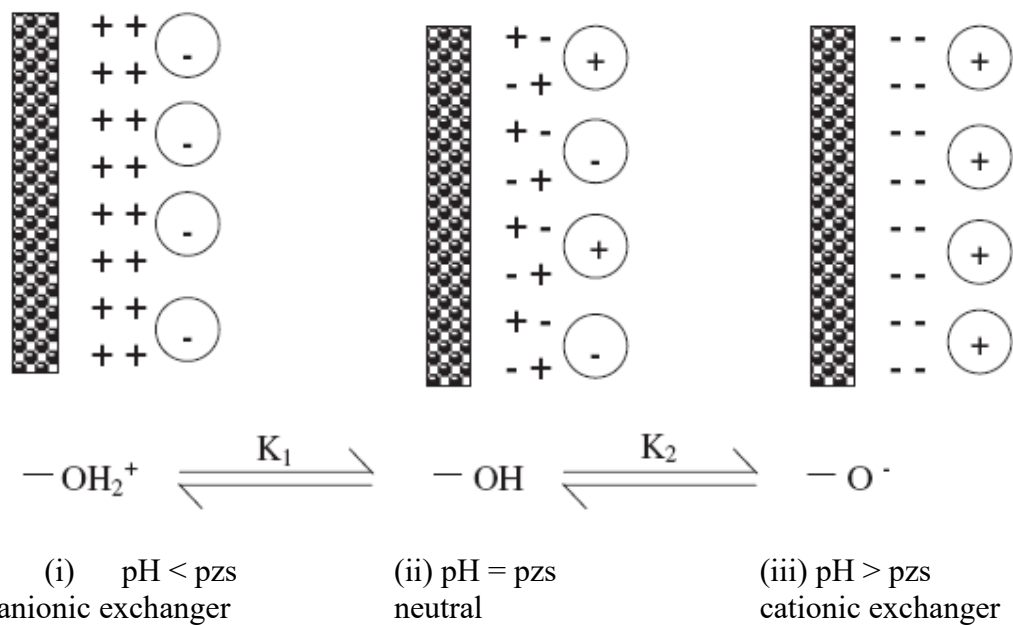

**Figure A1.** Schematic representation of the protonation/deprotonation process of the adsorbent surface [2].

1. Al-Maliky, E.A.; Gzar, H.A.; Al-Azawy, M.G.; Determination of point of zero charge (PZC) of concrete particles adsorbents. *IOP Conf. Ser.: Mater. Sci. Eng.* **2021**, *1184*, 012004.
2. Nasiruddin Khan, M.; Sarwar, A. Determination of points of zero charge of natural and treated adsorbents. *Surf. Rev. Lett.* **2007**, *14*(03), 461–469.
